# Supplementary material for: An AIE-active fluorescence turn-on bioprobe mediated by hydrogen-bonding interaction for highly sensitive detection of hydrogen peroxide and glucose
Source: Royal Society of Chemistry journal article supplement (doi:10.1039/c6cc05049b), 2016-01-01
Supplement: c6cc05049b1.pdf [file c6cc05049b1.pdf]

*Electronic Supplementary Information*

**An AIE-active fluorescence turn-on bioprobe mediated by hydrogen-bonding interaction for highly sensitive detection of hydrogen peroxide and glucose**

Zhegang Song, ‡<sup>a</sup> Ryan T. K. Kwok, ‡<sup>a</sup> Dan Ding,<sup>b</sup> Han Nie,<sup>a</sup> Jacky W. Y. Lam,<sup>a</sup> Bin Liu<sup>c</sup>

and Ben Zhong Tang\*<sup>a</sup>

<sup>a</sup> *Department of Chemistry, Hong Kong Branch of Chinese National Engineering Research Center for Tissue Restoration and Reconstruction, Institute for Advanced Study, Division of Biomedical Engineering, Division of Life Science, State Key Laboratory of Molecular Neuroscience and Institute of Molecular Functional Materials, The Hong Kong University of Science and Technology, Clear Water Bay, Kowloon, Hong Kong, China. Email: tangbenz@ust.hk.*

<sup>b</sup> *State Key Laboratory of Medicinal Chemical Biology, Key Laboratory of Bioactive Materials, Ministry of Education and College of Life Sciences, Nankai University, Tianjin 300071, China*

<sup>c</sup> *Department of Chemical and Biomolecular Engineering, National University of Singapore, 4 Engineering Drive 4, Singapore 117585.*

‡ These authors contributed equally to this work.

\*Corresponding author: [tangbenz@ust.hk](mailto:tangbenz@ust.hk) (B.Z.T)

## Table of Contents

|                                                                                                                                                                                                                                                                                           |       |
|-------------------------------------------------------------------------------------------------------------------------------------------------------------------------------------------------------------------------------------------------------------------------------------------|-------|
| <b>Experimental section</b> .....                                                                                                                                                                                                                                                         | S3-S4 |
| <b>Scheme S1</b> Synthetic route to TPE-HPro and <b>1</b> .....                                                                                                                                                                                                                           | S4    |
| <b>Fig. S1</b> <sup>1</sup> H NMR and <sup>13</sup> C NMR spectra of TPE-HPro .....                                                                                                                                                                                                       | S5    |
| <b>Fig. S2</b> High resolution mass spectrum of TPE-HPro .....                                                                                                                                                                                                                            | S5    |
| <b>Fig. S3</b> <sup>1</sup> H NMR and <sup>13</sup> C NMR spectra of compound <b>1</b> .....                                                                                                                                                                                              | S6    |
| <b>Fig. S4</b> High resolution mass spectrum of compound <b>1</b> .....                                                                                                                                                                                                                   | S6    |
| <b>Fig. S5</b> Optimization of pH for H <sub>2</sub> O <sub>2</sub> detection .....                                                                                                                                                                                                       | S7    |
| <b>Fig. S6</b> PL detection of H <sub>2</sub> O <sub>2</sub> at pH = 9.0 .....                                                                                                                                                                                                            | S7    |
| <b>Fig. S7</b> <sup>1</sup> H NMR spectrum of TPE-HPro after reaction with H <sub>2</sub> O <sub>2</sub> at pH 10.0 .....                                                                                                                                                                 | S8    |
| <b>Fig. S8</b> HRMS spectrum of TPE-HPro after reaction with H <sub>2</sub> O <sub>2</sub> at pH 10.0 .....                                                                                                                                                                               | S8    |
| <b>Fig. S9</b> Selectivity test of TPE-HPro for ROS detection .....                                                                                                                                                                                                                       | S9    |
| <b>Fig. S10</b> PL spectra for glucose assay .....                                                                                                                                                                                                                                        | S9    |
| <b>Fig. S11</b> PL spectra of TPE-HPro supplemented with GOx incubated in Tris-HCl buffer (pH 10.0), buffer mixture with 1% FBS and buffer mixture with 1% FBS and glucose for 0 h and 1 h. Solution concentration: 40 μM; incubation temperature: 37 °C; [GOx]: 2 U/mL; [Glu]: 1 mM..... | S10   |

## Experimental Section

### Materials and instrumentation

All chemicals and reagents were commercially available and used as received without further purification. Acetonitrile (ACN) and diethyl ether (Et<sub>2</sub>O) purified by Innovative Solvent Purification System. Tetrahydrofuran (THF) was distilled from sodium benzophenone ketyl under nitrogen immediately prior to use. Ethanol (EtOH) was dried by anhydrous magnesium sulphate and filtered prior to use. Benzophenone, 4-aminobenzophenone, salicylaldehyde, zinc powder, pinacol, benzoyl peroxide (BPO) and N-bromosuccinimide (NBS) were purchased from Sigma-Aldrich. Benzaldehyde, anhydrous magnesium sulphate, D(+)-glucose, potassium carbonate were obtained from Merck Chemicals Co. Hydrogen peroxide, glucose oxidase (GOx) from *Aspergillus niger* and saccharides used in the selectivity test were purchased from Sigma-Aldrich. Fetal bovine serum (FBS) was purchased from Gibco. Tris-HCl buffer (pH = 10.0, 10 mM) were prepared with pure water from a Millipore filtration system. Buffers (pH = 7–13) were commercially available from Aldrich. <sup>1</sup>H and <sup>13</sup>C spectra were measured on a Bruker ARX 400 NMR spectrometer using CDCl<sub>3</sub> and CD<sub>2</sub>Cl<sub>2</sub> as solvents and tetramethylsilane (TMS; δ = 0 ppm) was chosen as internal reference. UV absorption spectra and photoluminescence (PL) spectra were recorded on a Biochrom spectrophotometer and a Perkin-Elmer LS 55 spectrofluorometer, respectively. High-resolution mass spectra (HRMS) were obtained on a GCT Premier CAB 048 mass spectrometer operated in MALDI-TOF mode. Fluorescence images were taken on an FL microscope (BX41 Microscope).

### Synthesis of *N*-2-((4-(4,4,5,5-tetramethyl-1,3,2-dioxaborolan-2-yl)benzyl)oxy)benzylidene)-4-(1,2,2-triphenylvinyl)aniline (TPE-HPro)

4-(1,2,2-triphenylvinyl)aniline (**2**) and 2-((4-(4,4,5,5-tetramethyl-1,3,2-dioxaborolan-2-yl)benzyl)oxy)benzaldehyde (**3**) was synthesized according to our previous report. Compound **2** (0.5 mmol, 174 mg) and compound **3** (0.55 mmol, 186 mg) were dissolved in anhydrous ethanol and heated to reflux under N<sub>2</sub> atmosphere for 12h. After the resulting reaction mixture cooled to room temperature, the precipitates were collected by suction filtration and washed by ethanol and hexane for three times. The target product was obtained as pale yellow powder after dried in vacuum. Yield = 43%. <sup>1</sup>H NMR (400 MHz, CDCl<sub>3</sub>): δ (TMS, ppm) 8.95 (s, 1H), 8.13–8.11 (d, 1H), 7.81–7.79 (d, 2H), 7.46–7.40 (m, 3H), 7.17–6.96 (m, 21H), 5.21 (s, 2H), 1.35 (s, 12H). <sup>13</sup>C NMR (100 MHz, CDCl<sub>3</sub>): δ (TMS, ppm) 157.98, 154.89, 150.06, 143.18, 140.74, 140.26, 139.98, 139.15, 134.27, 131.92, 131.63, 131.39, 130.63, 130.56, 127.50, 127.09, 126.99, 126.95, 126.87, 126.83, 126.73, 125.81, 125.75, 125.67, 125.37, 124.52, 120.45, 119.70, 113.28, 112.07, 83.22, 69.63, 24.02. HRMS (MALDI-TOF), *m/z* calcd. for C<sub>46</sub>H<sub>42</sub>BNO<sub>3</sub>: 667.3258. Found 667.3268 (M<sup>+</sup>).

### Synthesis of 2-(((4-(1,2,2-triphenylvinyl)phenyl)imino)methyl)phenol (**1**)

Compound **2** (0.4 mmol, 139 mg) and salicylaldehyde (0.44 mmol, 54 mg) were dissolved in 10 mL anhydrous ethanol and the reaction mixture was heated to reflux overnight. After the resulting solution cooled to room temperature, the precipitates were collected by suction filtration and washed with ethanol and hexane for three times. The desired product was obtained as yellow powder after dried in vacuum. Yield = 83%. <sup>1</sup>H NMR (400 MHz, CDCl<sub>3</sub>): δ (TMS, ppm) 13.29 (s, 1H), 8.59 (s, 1H), 7.36 (t, 2H), 7.15–6.92 (m, 21H). <sup>13</sup>C NMR (100 MHz, CDCl<sub>3</sub>): δ (TMS, ppm) 161.30, 160.51, 145.65, 142.98, 142.90, 142.10, 140.76, 139.51, 132.39, 131.80, 131.52, 130.74, 130.70, 130.68, 127.20, 127.12, 127.03, 125.99, 125.95, 125.88, 119.90, 118.60. HRMS (MALDI-TOF), *m/z* calcd. for C<sub>33</sub>H<sub>25</sub>NO: 451.1936. Found 451.2018 (M<sup>+</sup>).

### Fluorescence detection of hydrogen peroxide and dynamic monitoring of reaction process

A 40  $\mu\text{M}$  TPE-HPro probe solution was prepared by mixing 200  $\mu\text{L}$  of the stock solution (400  $\mu\text{M}$ , in ACN) with 1.8 mL of Tris-HCl buffer (10 mM, pH 10.0). Different amounts of  $\text{H}_2\text{O}_2$  stock solutions (1 M) were added into the Tris-HCl buffer solution to yield final concentrations of  $\text{H}_2\text{O}_2$  from 0 to 200  $\mu\text{M}$ . PL measurements were carried out after the prepared solutions upon incubation at 37  $^\circ\text{C}$  for 40 min. The experimental conditions for other PL measurements (pH optimization, selectivity test, etc.) were the same unless otherwise specified. The reaction process was monitored by the fluorescence spectral measurements which scanned at intervals of 2 min. Various ROS were prepared according to previous report.

### Fluorescence detection of glucose

The probe solutions for fluorescence detection of glucose was prepared by blending 1.78 mL of Tris-HCl buffer (10 mM, pH 10.0), 20  $\mu\text{L}$  GOx stock solutions (200 U/mL) and 200  $\mu\text{L}$  TPE-HPro stock solution (400  $\mu\text{M}$ , in ACN). Then different amounts of glucose were added to pre-blended solutions of probes and GOx and carefully mixed, with the concentration of glucose ranging from 0 to 400  $\mu\text{M}$ . PL measurements were carried out after the prepared solutions upon incubation at 37  $^\circ\text{C}$  for 1 h. For the experiments of glucose detection with FBS, all the conditions are exactly the same as those in buffers except for extra addition of 20  $\mu\text{L}$  FBS (1%).

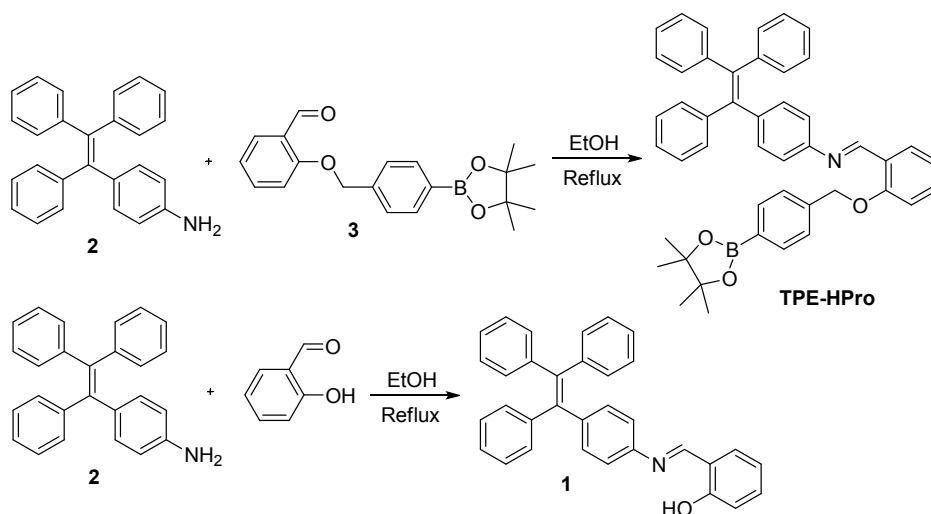

**Scheme S1** Synthetic route to TPE-HPro and compound 1.

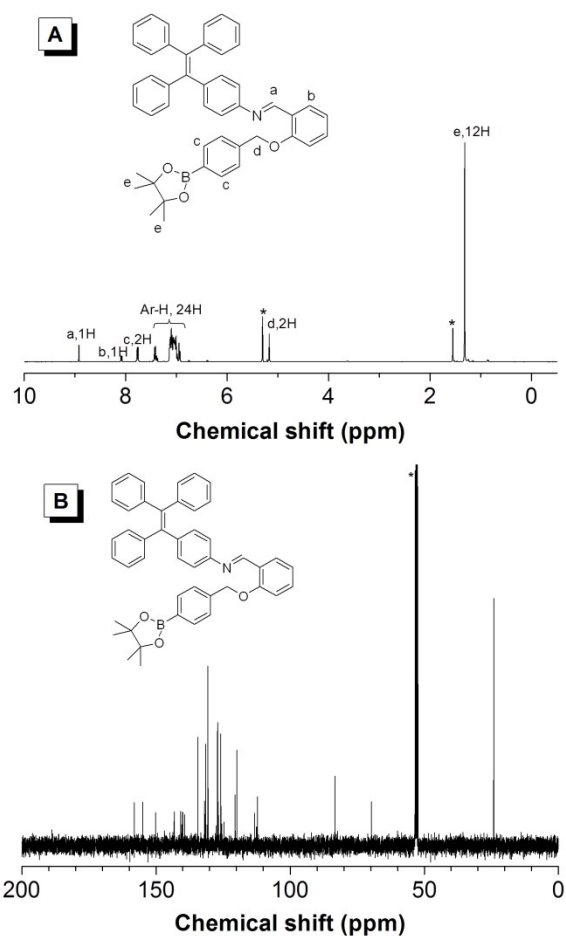

**Fig. S1**  $^1\text{H}$  NMR (A) and  $^{13}\text{C}$  NMR (B) of TPE-HPro in  $\text{CD}_2\text{Cl}_2$ .

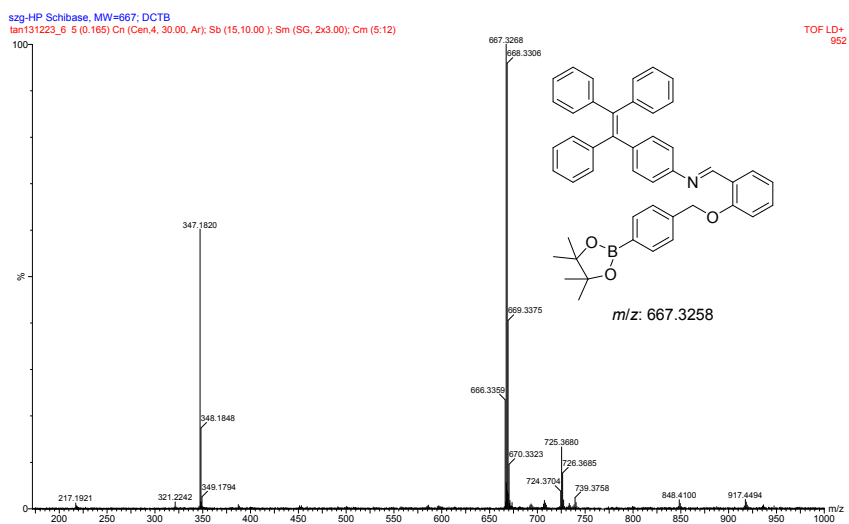

**Fig. S2** HRMS spectrum of TPE-HPro.

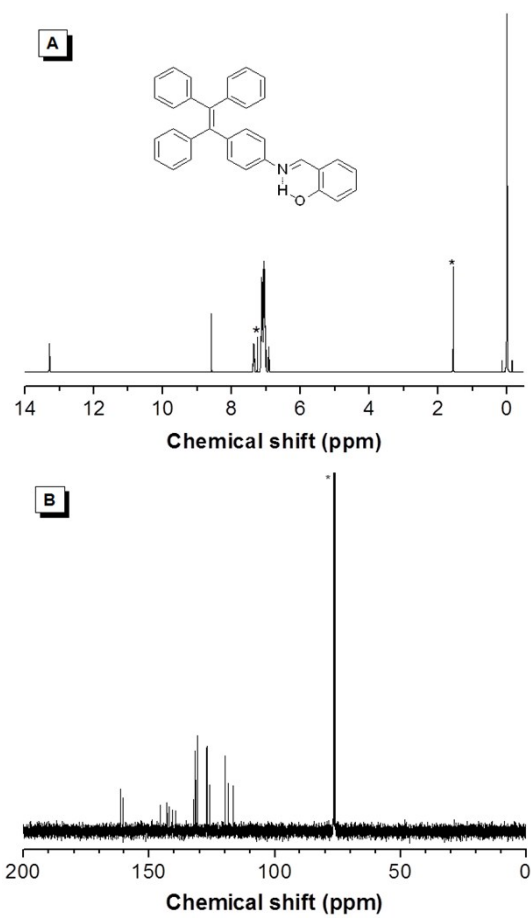

**Fig. S3**  $^1\text{H}$  NMR (A) and  $^{13}\text{C}$  NMR (B) of **1** in  $\text{CDCl}_3$ .

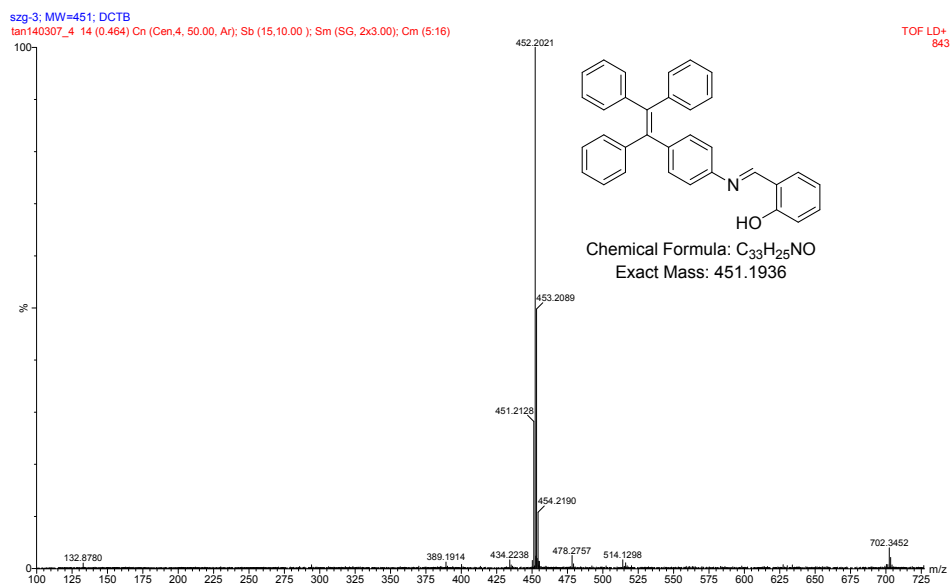

**Fig. S4** HRMS spectrum of **1**.

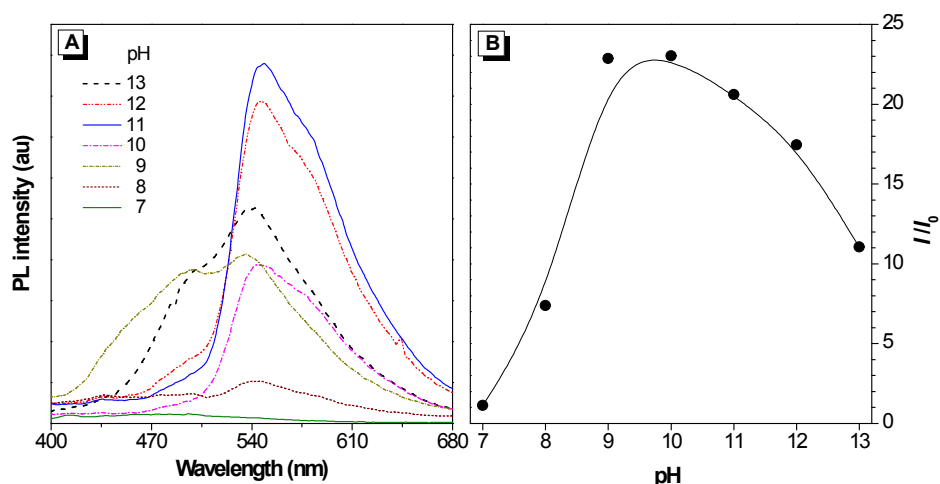

**Fig. S5** (A) PL spectra of TPE-HPro in the acetonitrile/water mixtures (1 : 9 v/v) with different pH incubated with H<sub>2</sub>O<sub>2</sub> (150 μM) for 60 min. (B) Plot of relative PL intensity ( $I/I_0$ ) versus pH of acetonitrile/water mixture.  $I$  and  $I_0$  are the PL intensities after incubation with and without H<sub>2</sub>O<sub>2</sub> at the specific pH value. Solution concentration: 40 μM, excitation wavelength: 373 nm.

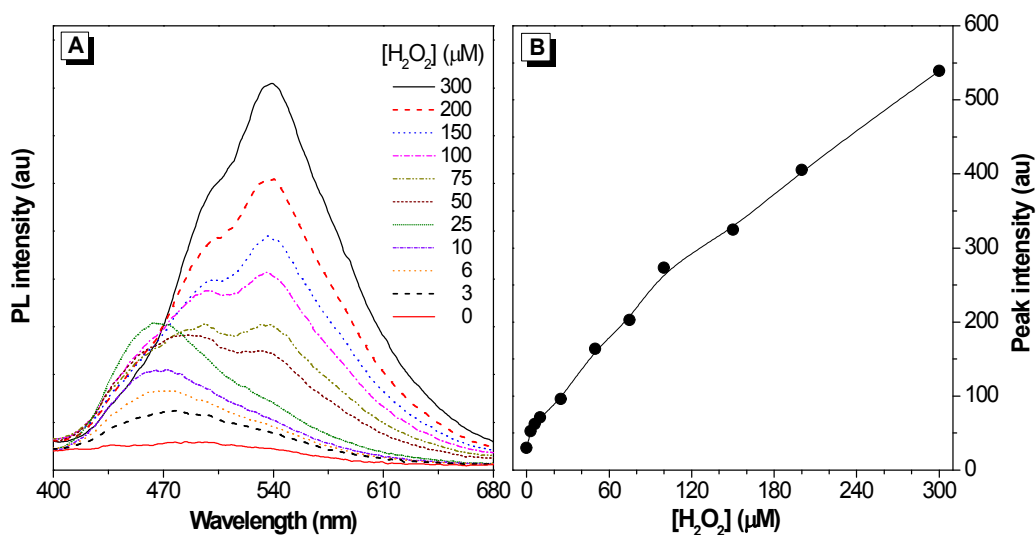

**Fig. S6** (A) PL spectra of TPE-HPro in acetonitrile/buffer mixture (1 : 9, v/v; pH 9.0) incubated with different concentrations of H<sub>2</sub>O<sub>2</sub> for 40 min at 37 °C. Solution concentration: 40 μM; excitation wavelength: 373 nm. (B) Plot of PL intensity at 540 nm versus the H<sub>2</sub>O<sub>2</sub> concentration.

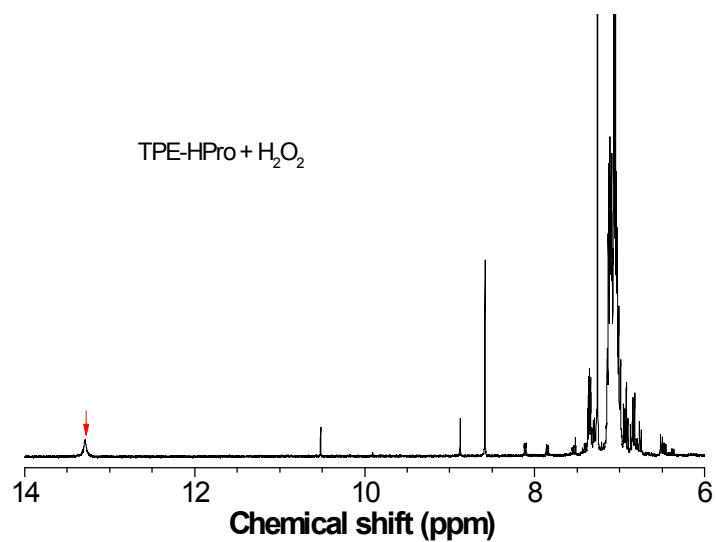

Fig. S7 <sup>1</sup>H NMR spectrum of TPE-HPro after reaction with H<sub>2</sub>O<sub>2</sub> at pH 10.0.

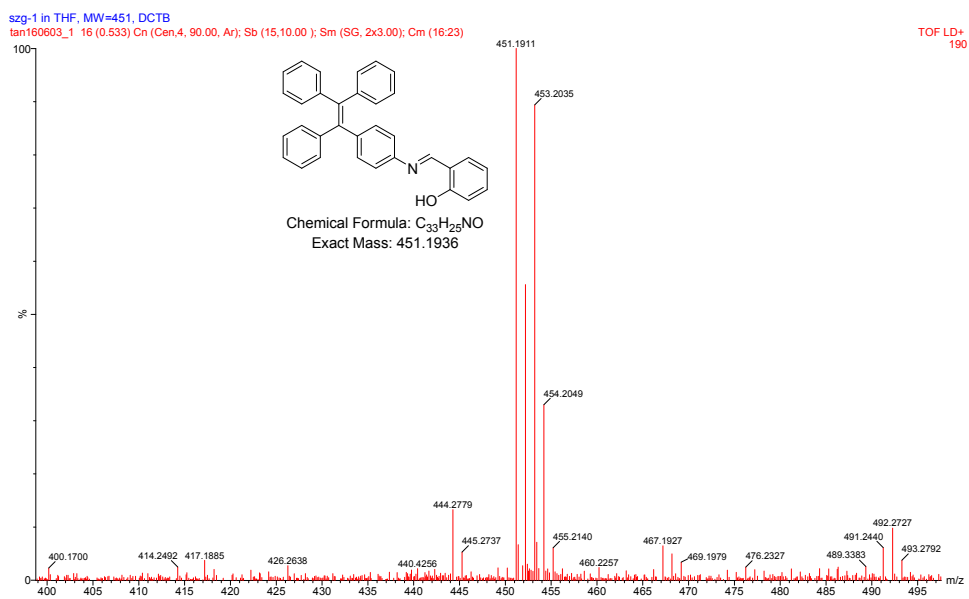

Fig. S8 HRMS spectrum of TPE-HPro after reaction with H<sub>2</sub>O<sub>2</sub> at pH 10.0.



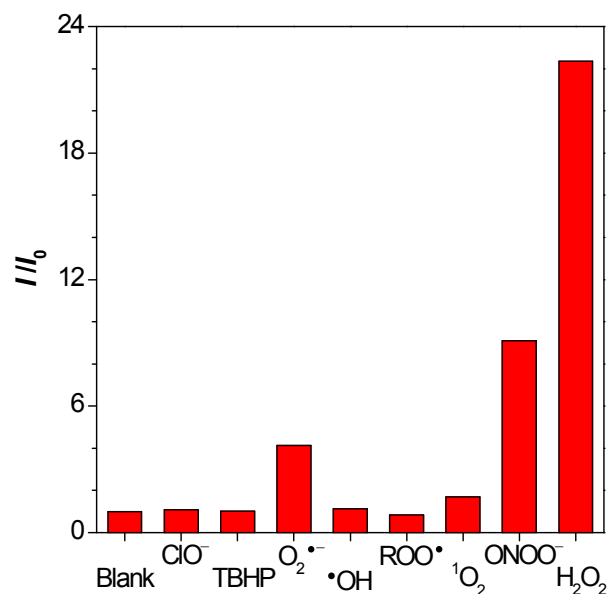

**Fig. S9** PL response of TPE-HPro in buffer solution (10 mM, pH = 10.0) buffer solution to different reactive oxygen species. [ $\text{ClO}^-$ ] = 100  $\mu\text{M}$ , [TBHP] = 100  $\mu\text{M}$ , [ $\text{O}_2^{\bullet-}$ ] = 100  $\mu\text{M}$ ,  $\bullet\text{OH}$ : 20 mg  $\text{FeSO}_4$  in 0.1 M  $\text{H}_2\text{O}_2$ , [ $\text{ROO}\bullet$ ] = 100  $\mu\text{M}$ , [ $^1\text{O}_2$ ] = 100  $\mu\text{M}$ , [ $\text{ONOO}^-$ ] = 100  $\mu\text{M}$ , [ $\text{H}_2\text{O}_2$ ] = 100  $\mu\text{M}$ ).

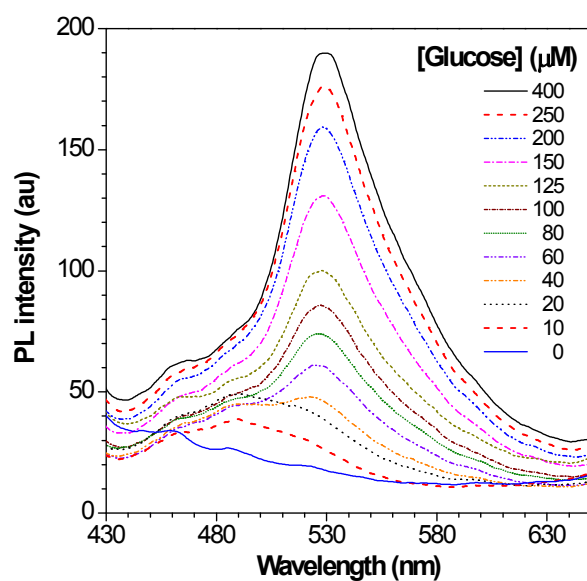

**Fig. S10** PL spectra of TPE-HPro in acetonitrile/buffer mixture (1 : 9, v/v; pH 10.0) incubated with GOx (2 U/mL) and different concentrations of glucose for 1h at 37 °C.

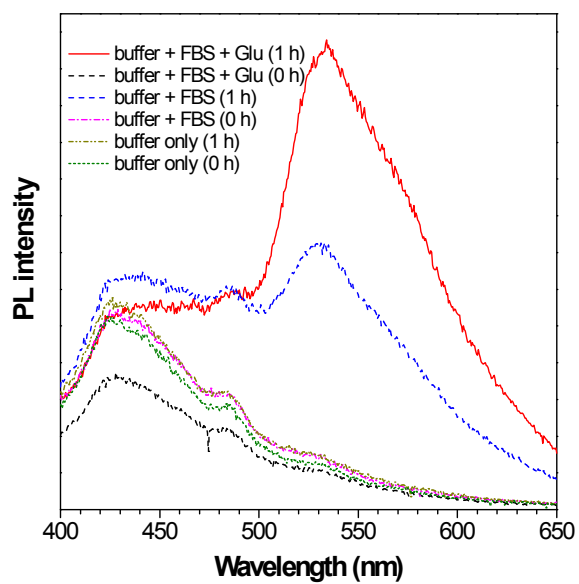

**Fig. S11** PL spectra of TPE-HPro supplemented with GOx incubated in Tris-HCl buffer (pH 10.0), buffer mixture with 1% FBS and buffer mixture with 1% FBS and glucose for 0 h and 1 h. Solution concentration: 40  $\mu$ M; incubation temperature: 37 oC; [GOx]: 2 U/mL; [Glu]: 1 mM.
